# Supplementary material for: Atmospheric submicron aerosol composition and particulate organic nitrate formation in a boreal forestland–urban mixed region
Source: Copernicus journal article supplement (doi:10.5194/acp-14-13483-2014), 2014-12-18
Supplement: Supplementary file 1 [file acp-14-13483-2014-supplement.pdf]

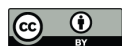

*Supplement of*

## **Atmospheric submicron aerosol composition and particulate organic nitrate formation in a boreal forestland–urban mixed region**

**L. Q. Hao et al.**

*Correspondence to:* L. Q. Hao ([hao.liqing@uef.fi](mailto:hao.liqing@uef.fi))

## **S1. Experimental**

### **S1.1 Trajectory analysis**

To investigate the aerosol regional source on the measurement site, 48 h back trajectories at 500m arrival height above ground level were computed every 2h using Hybrid Single Particle Lagrangian Integrated Trajectory model (HYSPLIT-4) (Draxler, R.R. and Rolph, G.D., 2013).

## **S2. Results and discussion**

### **S2.1 PMF factor solution**

Fig. S1 shows Positive Matrix Factorization (PMF) key diagnostics in this study. Five-factor solution  $F_{peak} +0.1$  were selected. Fig S2 shows the time series and profiles of PMF five-factor solution at  $F_{peak} = +0.1$ . Factors 3 and 4 produced meaningful time series and mass profiles but we could not find other gas or particle phase observations that correlate with them during the measurement. Thus these two factors were merged to generate a new factor by a mass-weighted combination. After merging, the four factors are NIA (nitrate inorganic aerosol), LVOOA (low-volatile oxygenated OA), SVOOA (semi-volatile oxygenated OA), HOA (hydrocarbon-like organic aerosol). In four-factor solution the factor 4 from 5-factor solution was divided between factor 5 and factor 2 and made HOA factor meaningless. In six-factor solution the LVOOA from five-factor solution was split into LVOOA1 (Factor 3) and LVOOA2 (Factor 4) without reasonable reason and doesn't give any better interpretation on the data (Fig. S4). Thus a five-factor solution was selected.

The rotational ambiguity of five-factor solution was explored by varying  $F_{peak}$  between -1.0 and +1.0. The choice of  $F_{peak} < -0.1$  gives periods of zeros in factor 4 that don't correspond to any events in observations. Increasing  $F_{peak}$  to +0.1 improves the corrections of SVOOA and NIA to nitrate compared to  $F_{peak}$  value of 0 whilst it does not affect the correlations of other factors to the external tracers. Thus  $F_{peak} = 0.1$  was selected (Fig. S5).

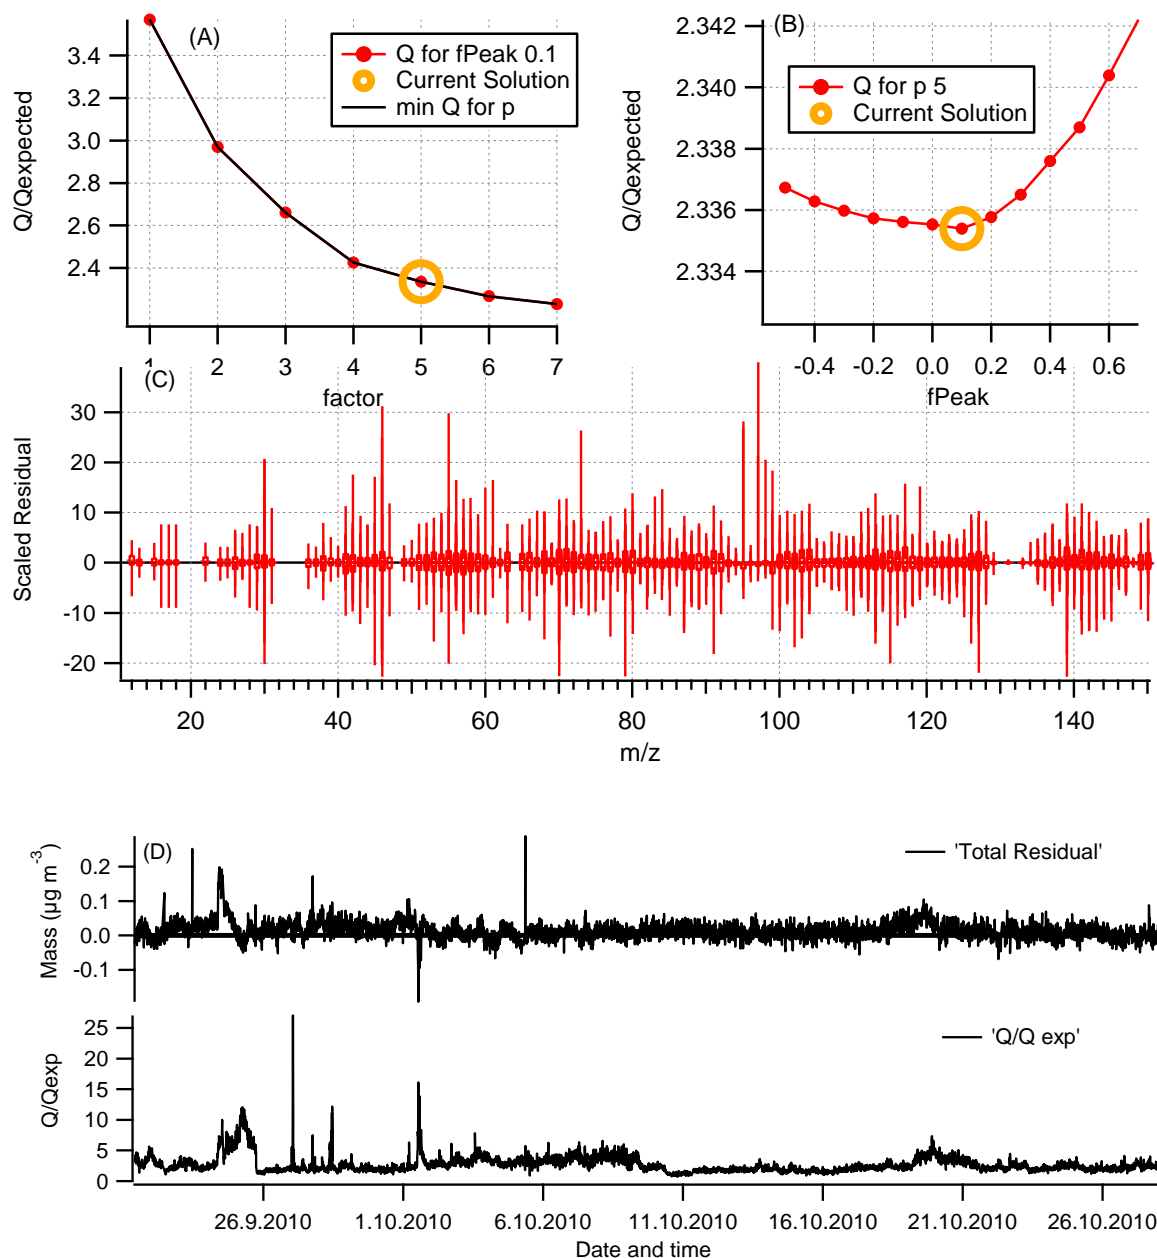

**Figure S1** PMF key diagnostics plots: (A)  $Q/Q_{\text{expected}}$  varies as function of PMF factor at fPeak 0.1; (B)  $Q/Q_{\text{expected}}$  varies as function of rotational ambiguity; (C) Scaled residual for each mass; (D) time series of the total residual and  $Q/Q_{\text{exp}}$  contribution for every point during this study. For more details on PMF and the interpretation of these plots see Ulbrich et al. (2009).

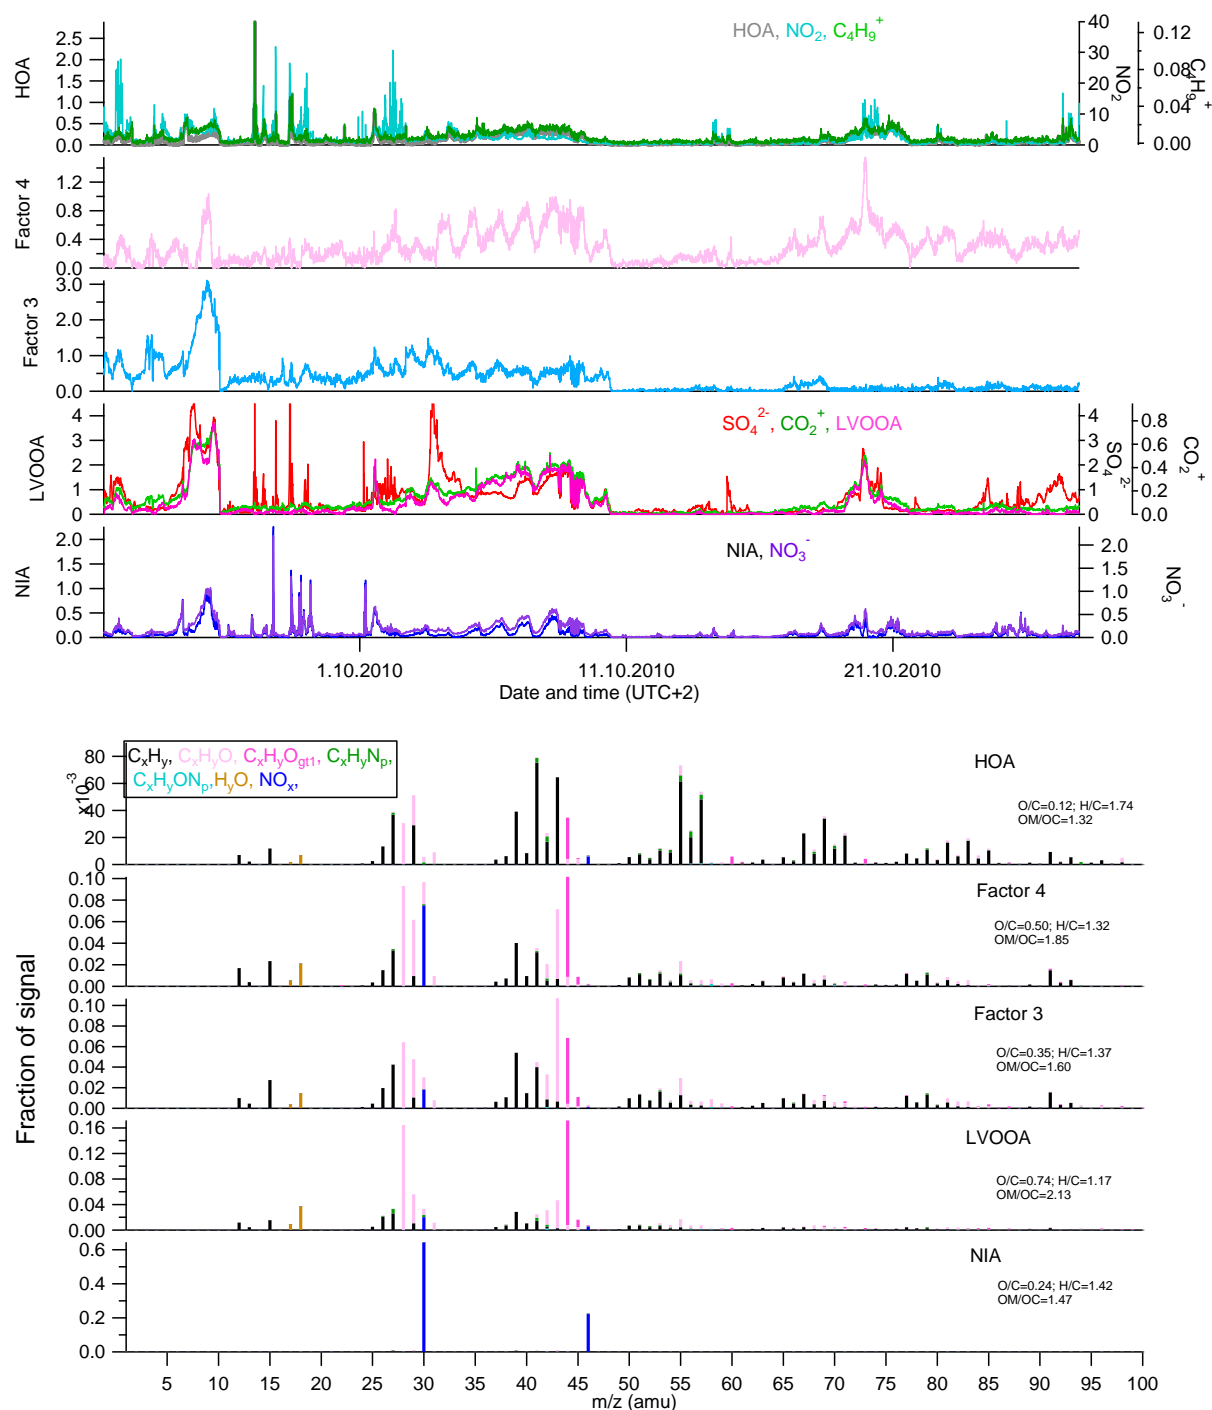

**Figure S2.** Time series and mass profiles by PMF analysis at five-factor solution. Factor 3 and 4 were merged to generate a new factor by a mass-weighted combination, which results are reported in the paper. HOA, hydrocarbon-like organic aerosol; LVOOA, low-volatile oxygenated OA; NIA, nitrate inorganic aerosol

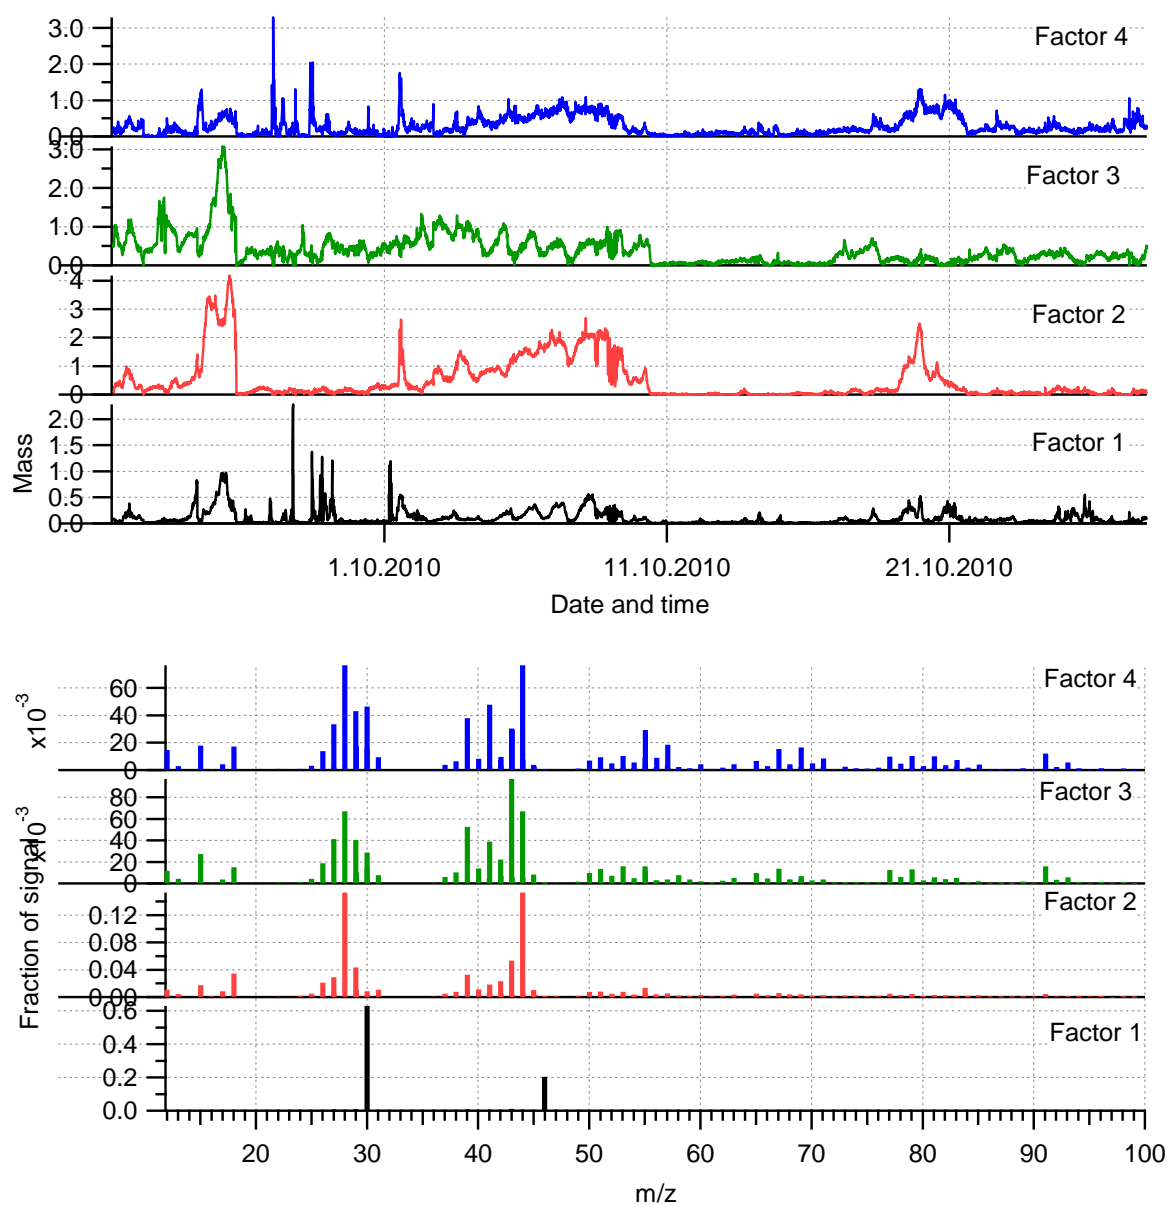

**Figure S3.** Time series and mass profiles by PMF analysis at four-factor solution with  $f_{\text{Peak}} = +0.1$ .

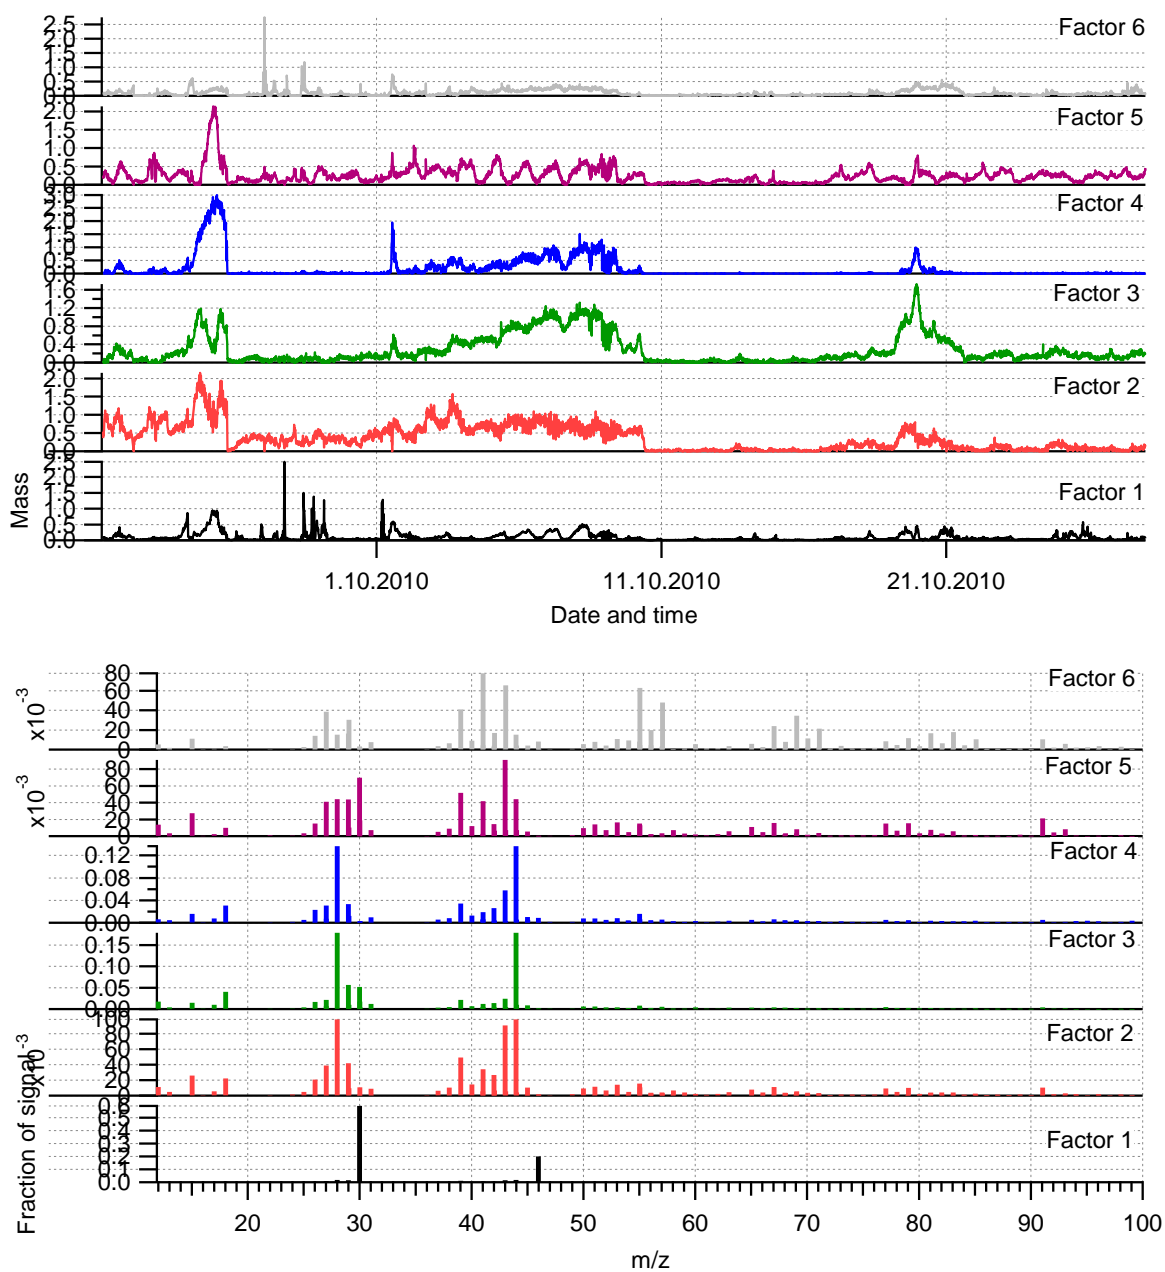

**Figure S4.** Time series and mass profiles by PMF analysis at six-factor solution with  $f_{\text{Peak}} = \pm 0.1$ .

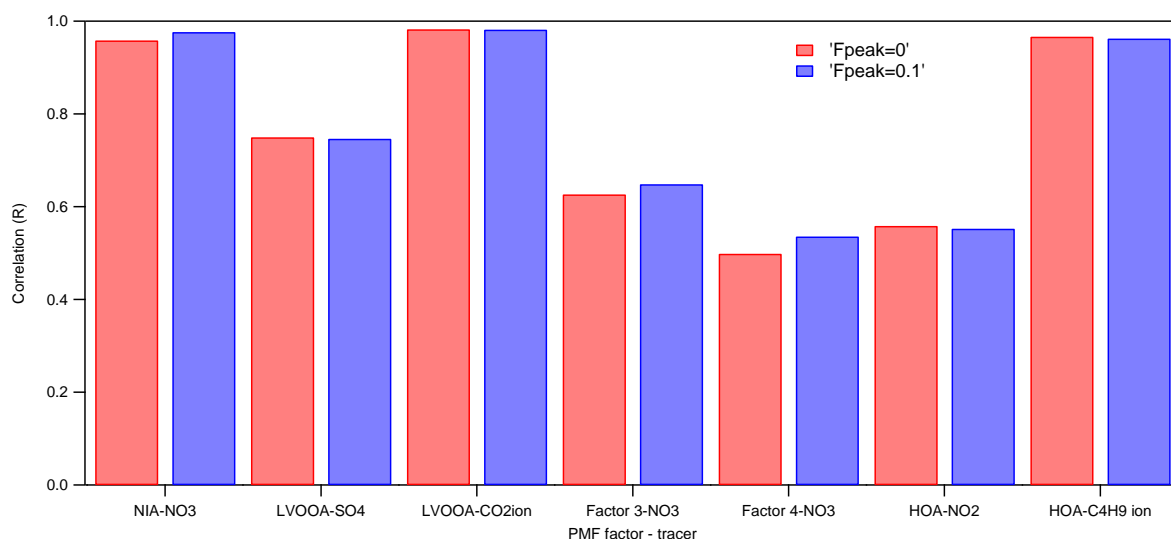

**Figure S5.** Correction coefficients between the PMF factors and tracers by varying Fpeak from 0 to +0.1.

## S2.2 Other supplementary plots

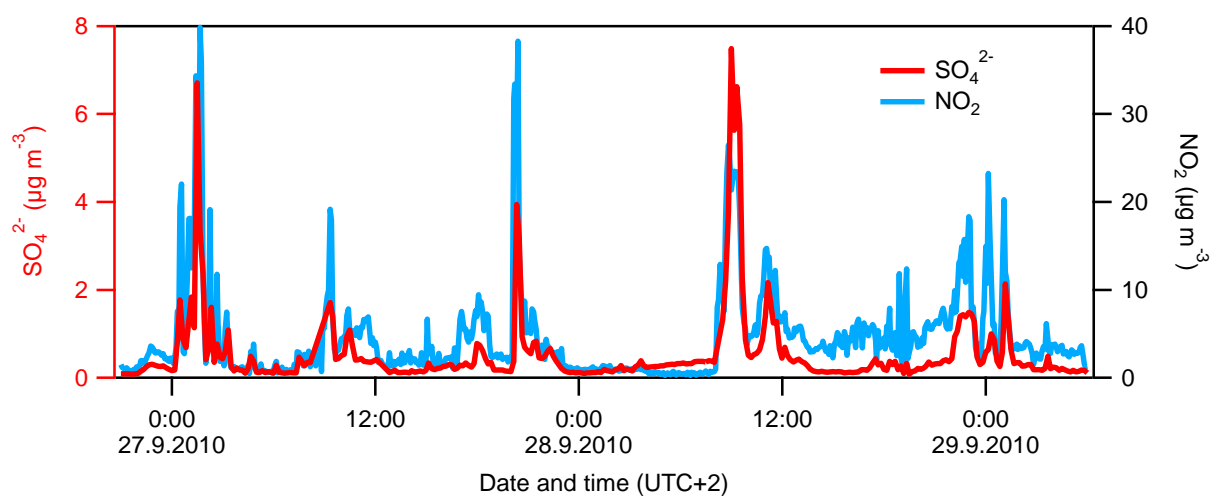

**Figure S7.** Comparisons of time series of  $\text{SO}_4^{2-}$  and  $\text{NO}_2$  during the primary aerosol emitting days, which is shown in the gray bar in Figure 1. Good correlation of  $\text{SO}_4^{2-}$  with  $\text{NO}_2$  suggests that the  $\text{SO}_4^{2-}$  is primary in nature during this period.

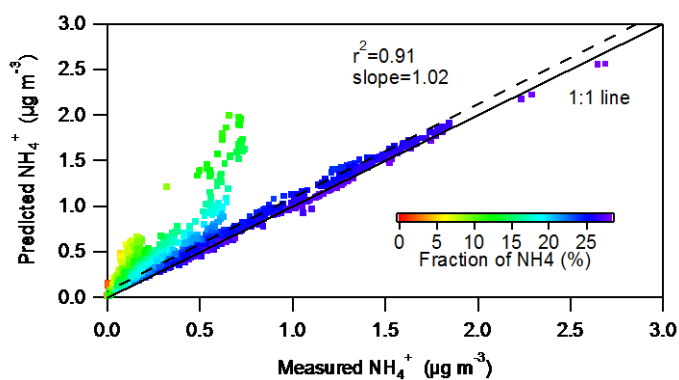

**Figure S8.** Predicted  $\text{NH}_4^+$  (assuming fully neutralized aerosol) vs measured  $\text{NH}_4^+$ , colored by the mass fraction of measured  $\text{NH}_4^+$  to the sum of  $\text{SO}_4^{2-} + \text{NO}_3^- + \text{Cl}^-$ . The predicted  $\text{NH}_4^+$  was determined by  $\text{NH}_4^+_{\text{pre}} = 18 \times (2 \times \text{SO}_4^{2-} / 96 + \text{NO}_3^- / 62 + \text{Cl}^- / 35.5)$ , where  $\text{NH}_4^+$ ,  $\text{SO}_4^{2-}$ ,  $\text{NO}_3^-$  and  $\text{Cl}^-$  represent the mass concentrations (in  $\mu\text{g m}^{-3}$ ) of the species and the denominators correspond to their molecular weights. The factor 18 is the molecular weight of  $\text{NH}_4^+$  (Zhang et al., 2007).

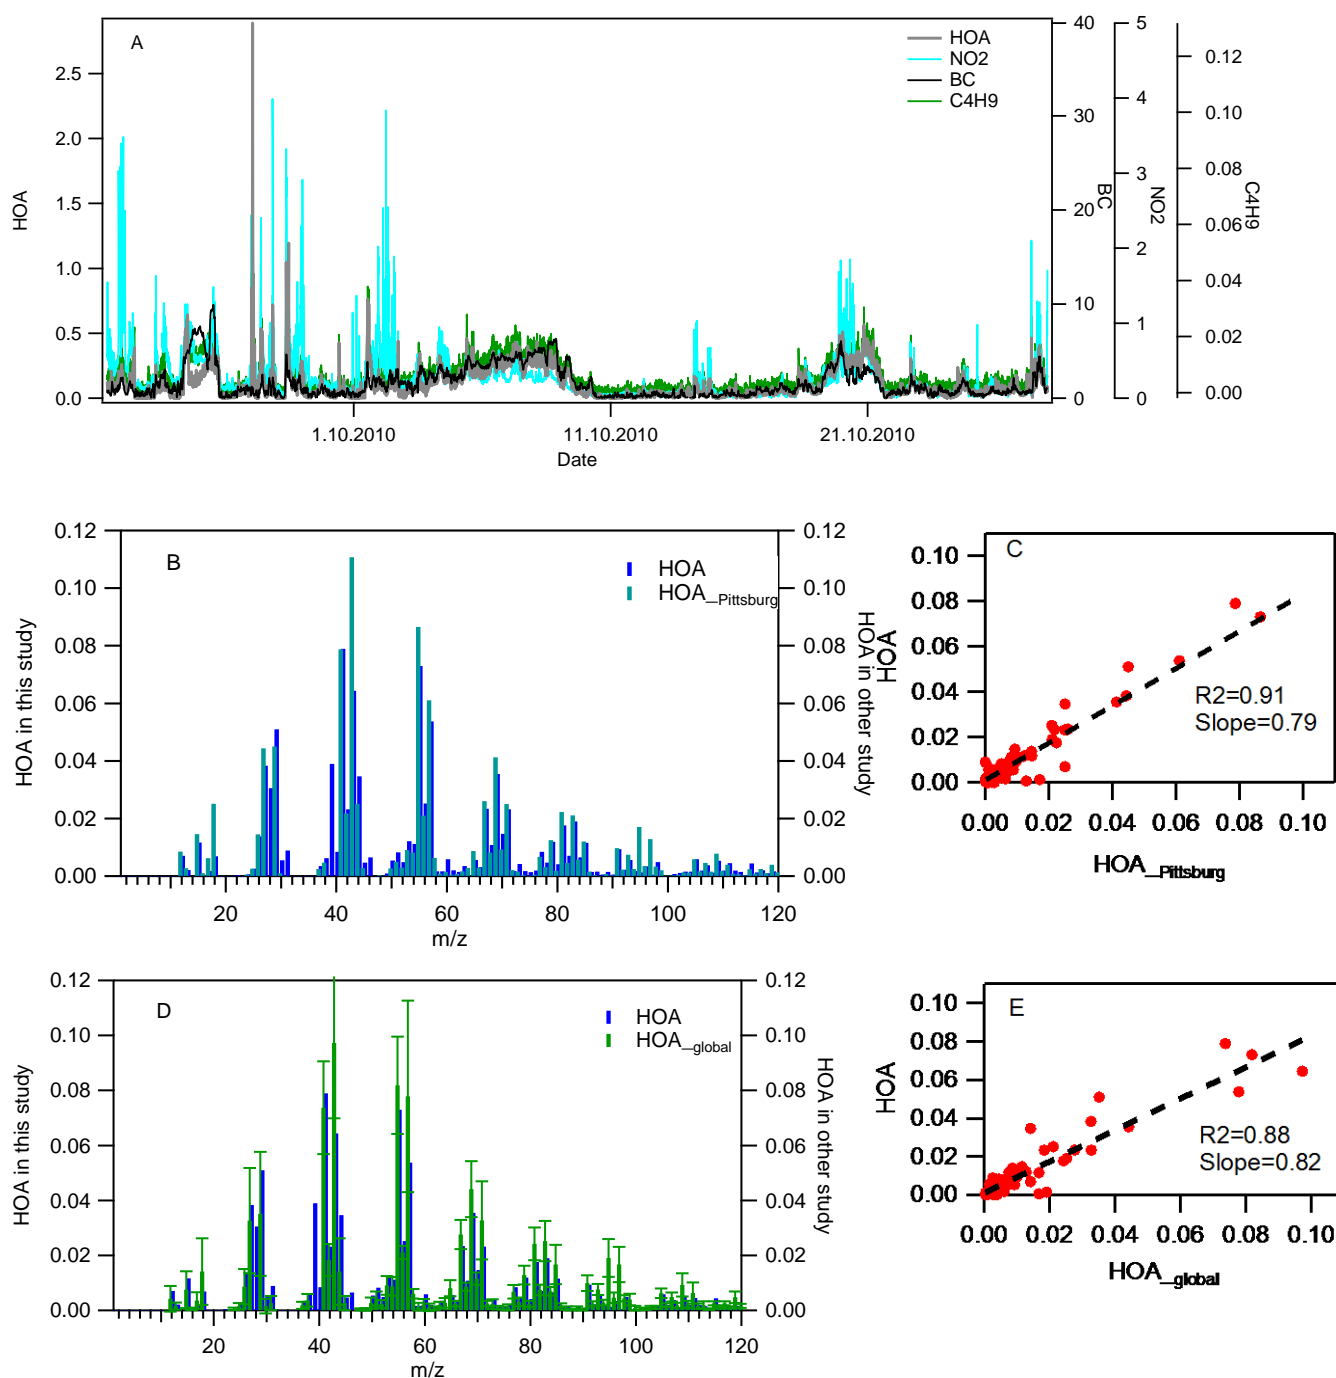

**Figure S9.** (A) Correlations of HOA time series with tracers; (B) Comparison of HOA mass spectrum from HOA determined in Pittsburgh (Ulbrich et al., 2009); (C) a scatter plot of HOA mass spectrum between this study and Pittsburgh; (D) Comparison of HOA mass spectrum from HOA determined on a global scale (Ng et al., 2010); (E) a scatter plot of HOA mass spectrum between this study and on a global scale;

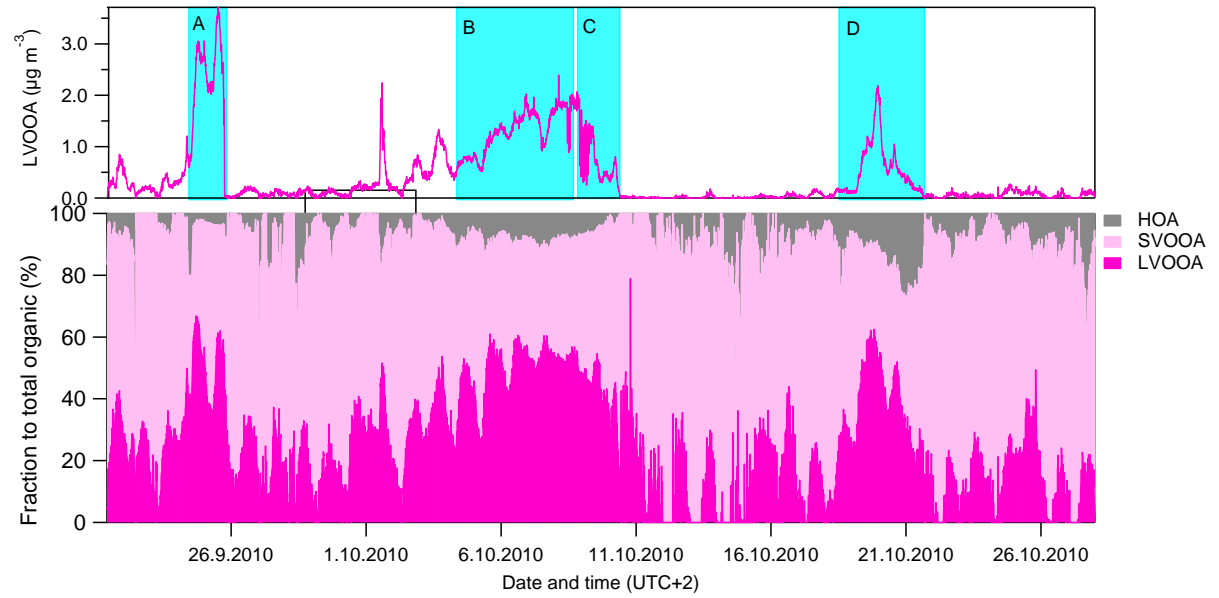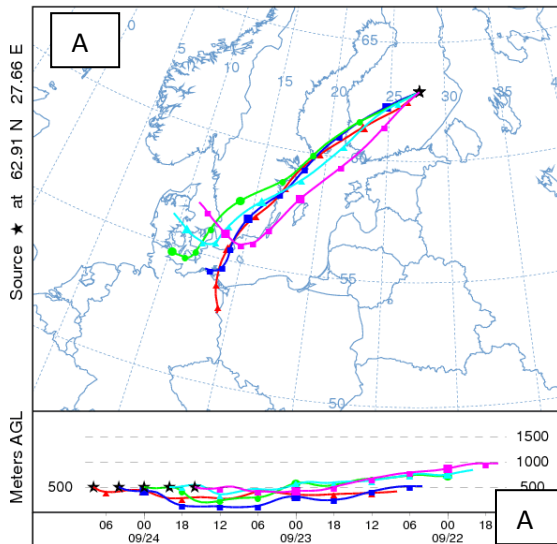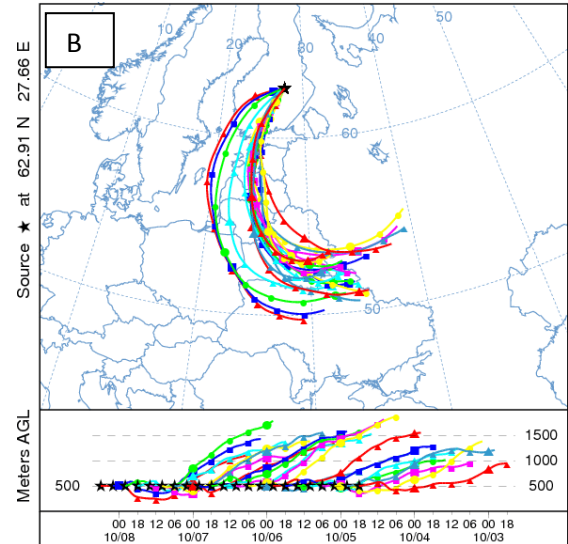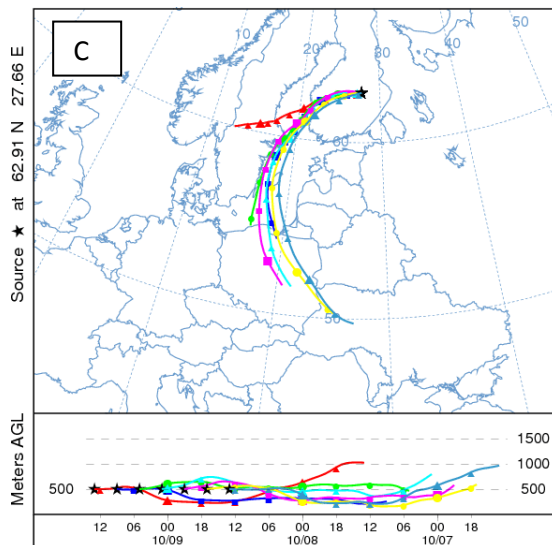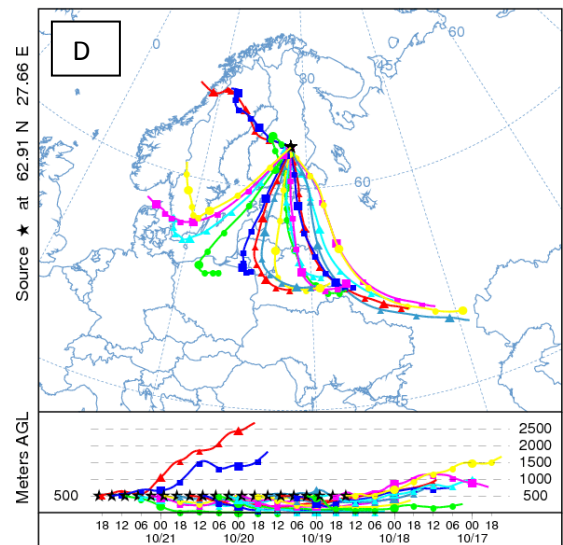

**Figure S10.** Top panel: time series of LVOOA and mass fractions of LVOOA to total organic. Four periods on the LVOOA plumes were selected for the back trajectory studies marked by blue bars. Bottom panel: Back trajectory analysis on the sources of LVOOA. The trajectories were conducted on the four plumes of LVOOA time series, showing LVOOA were from South Finland, south Sweden, central Europe.

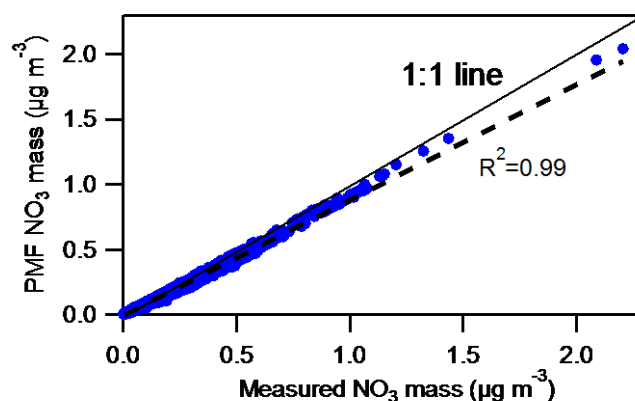

**Figure S11.** Comparisons of mass concentrations of nitrate aerosols between the fitted by PMF and the measured by AMS.

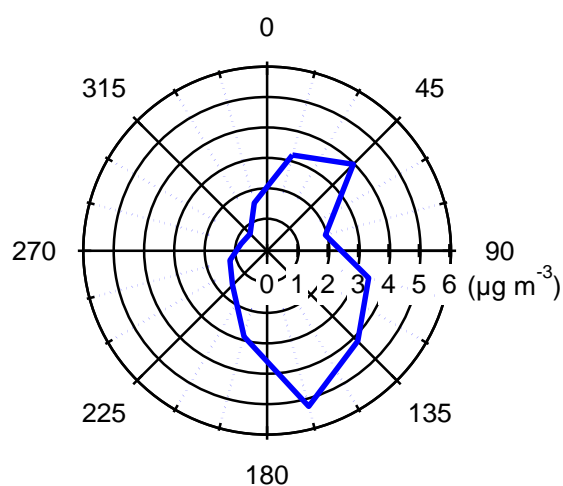

**Figure S12.** Wind rose for  $\text{NO}_2$ .

## References

- Draxler, R.R., and Rolph, G.D.: HYSPLIT (HYbrid Single-Particle Lagrangian Integrated Trajectory) Model access via NOAA ARL READY Website (<http://ready.arl.noaa.gov/HYSPLIT.php>). NOAA Air Resources Laboratory, Silver Spring, MD, 2003.
- Zhang, Q., Jimenez, J. L., Worsnop, D. R., and Canagaratna, M.: A case study of urban particle acidity and its influence on secondary organic aerosol, *Environ. Sci. Technol.*, 41, 3213–3219, 2007.
